# Supplementary material
Source: ML conference proceedings conference paper supplement (https://aclanthology.org/2025.disrpt-1.4)

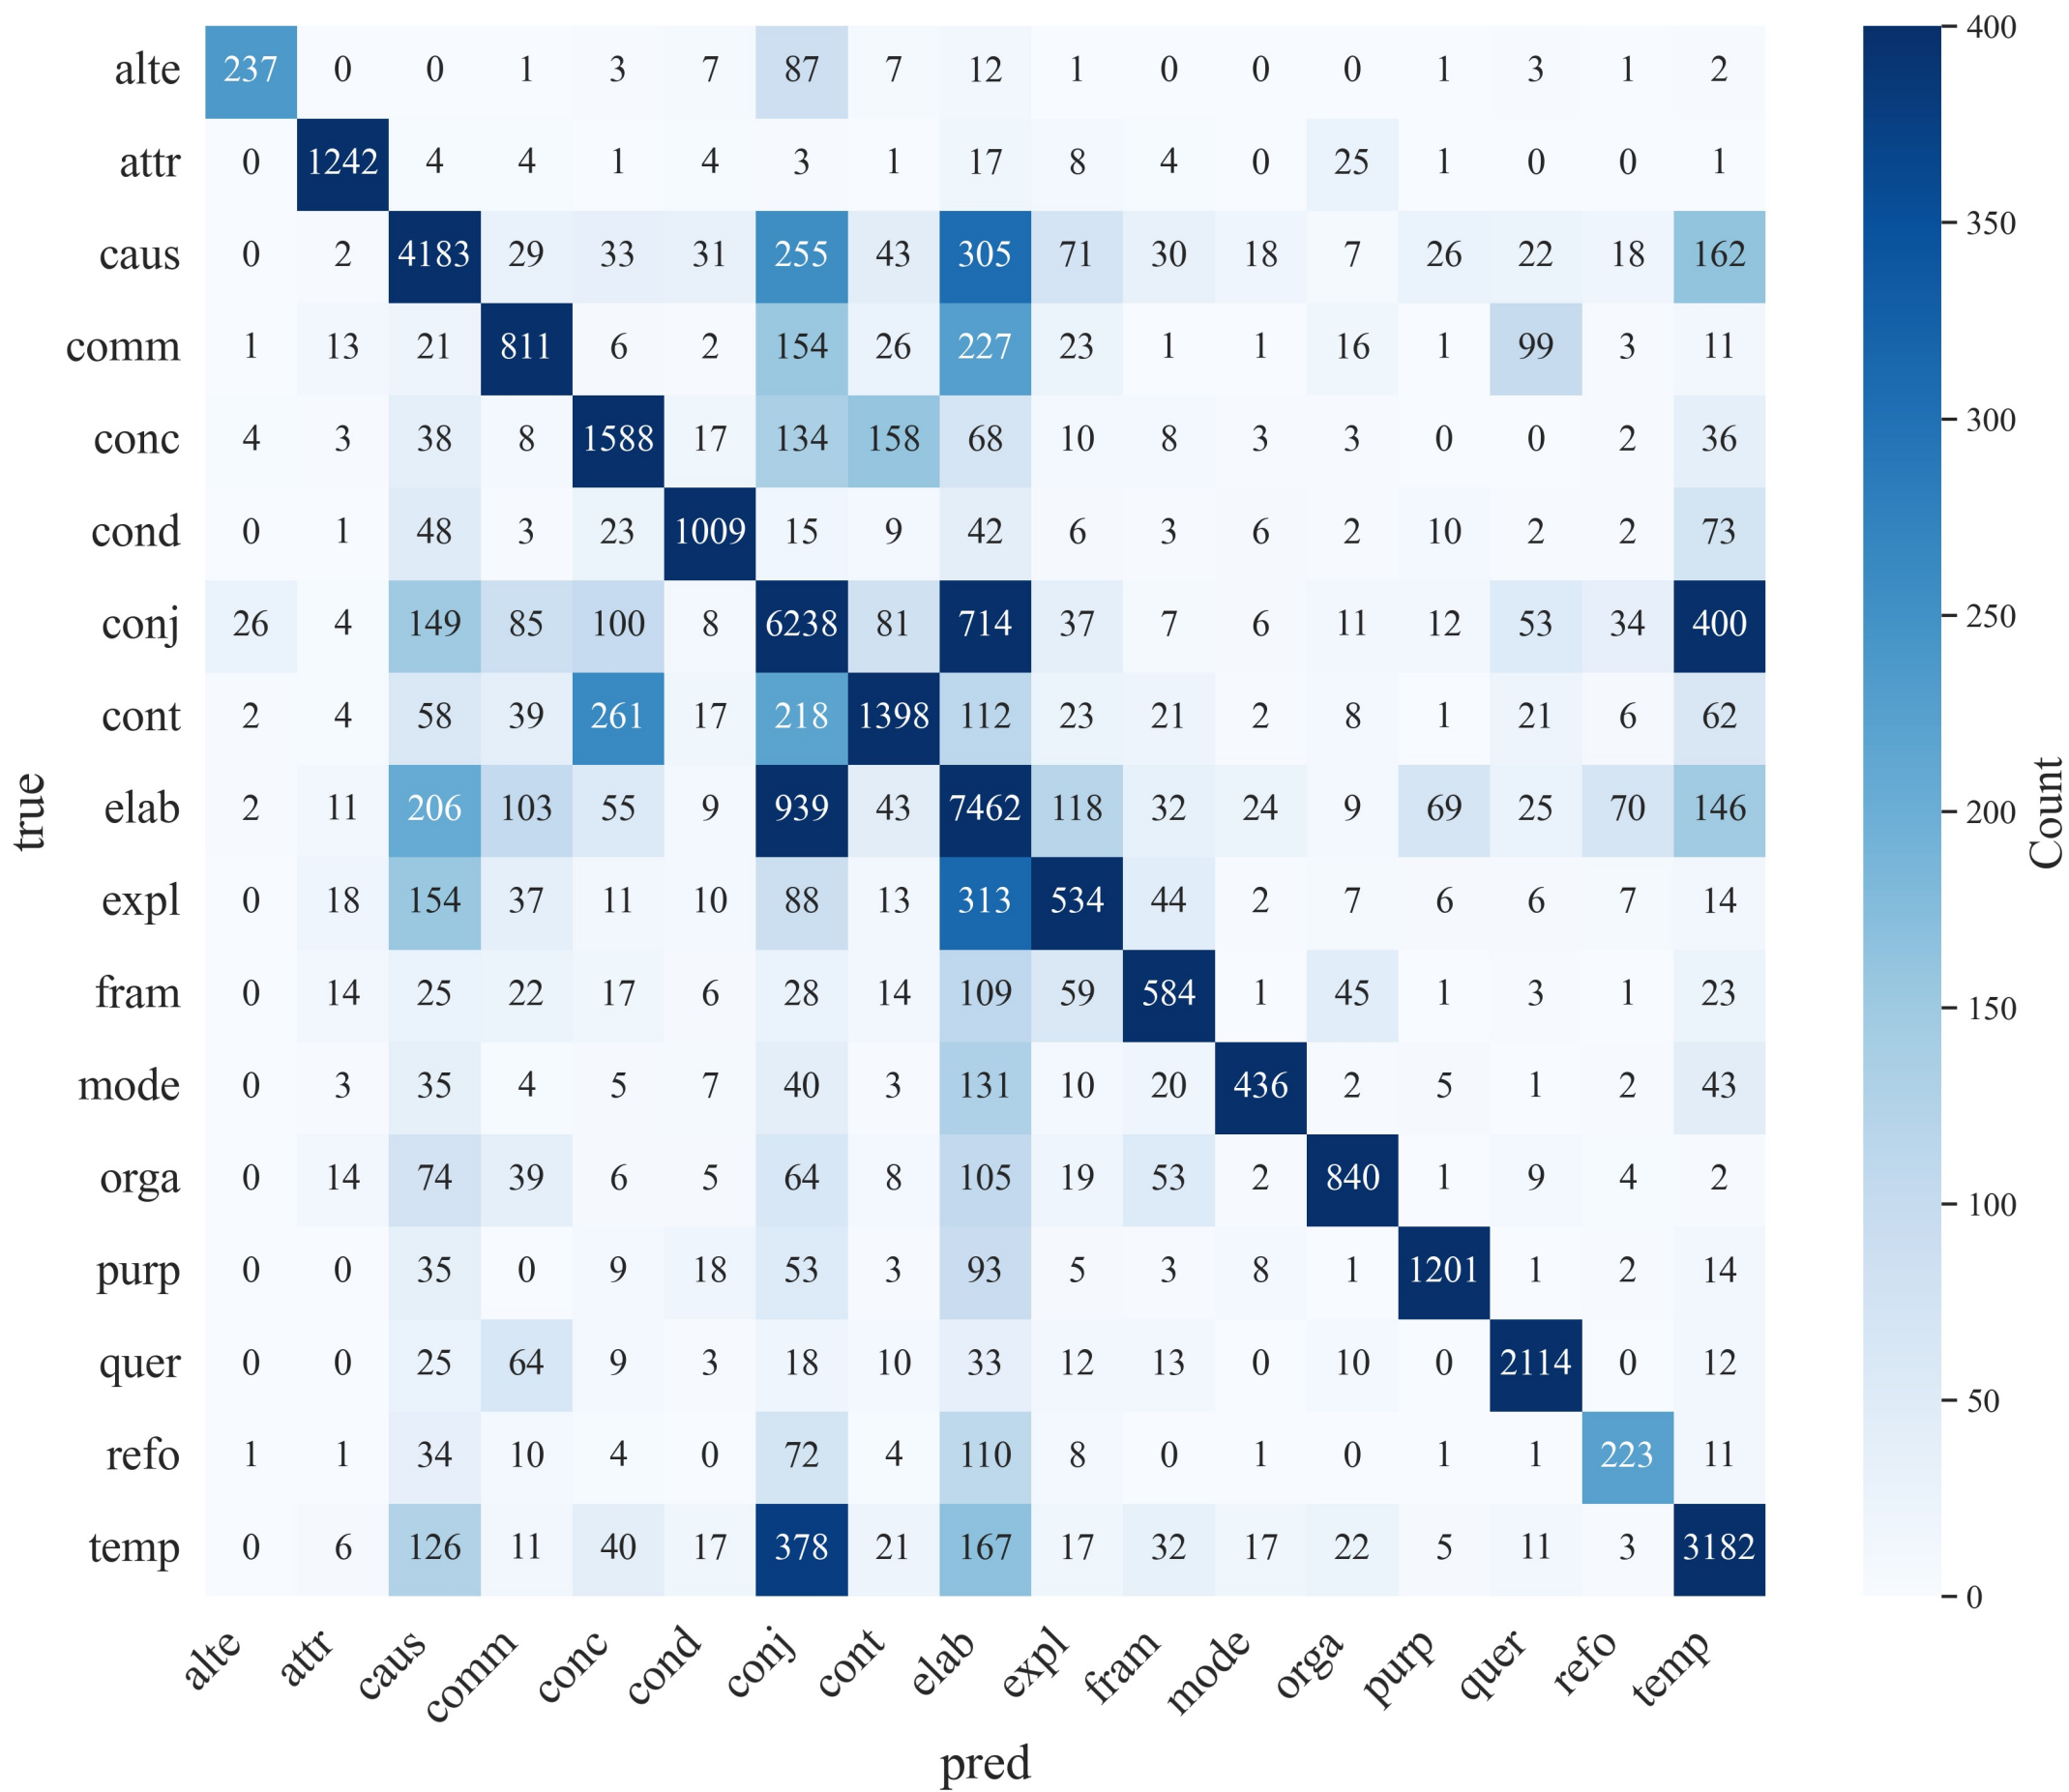

Supplement: SupplementaryMaterial [file all_confusion.pdf › imgs/all_confusion.pdf]

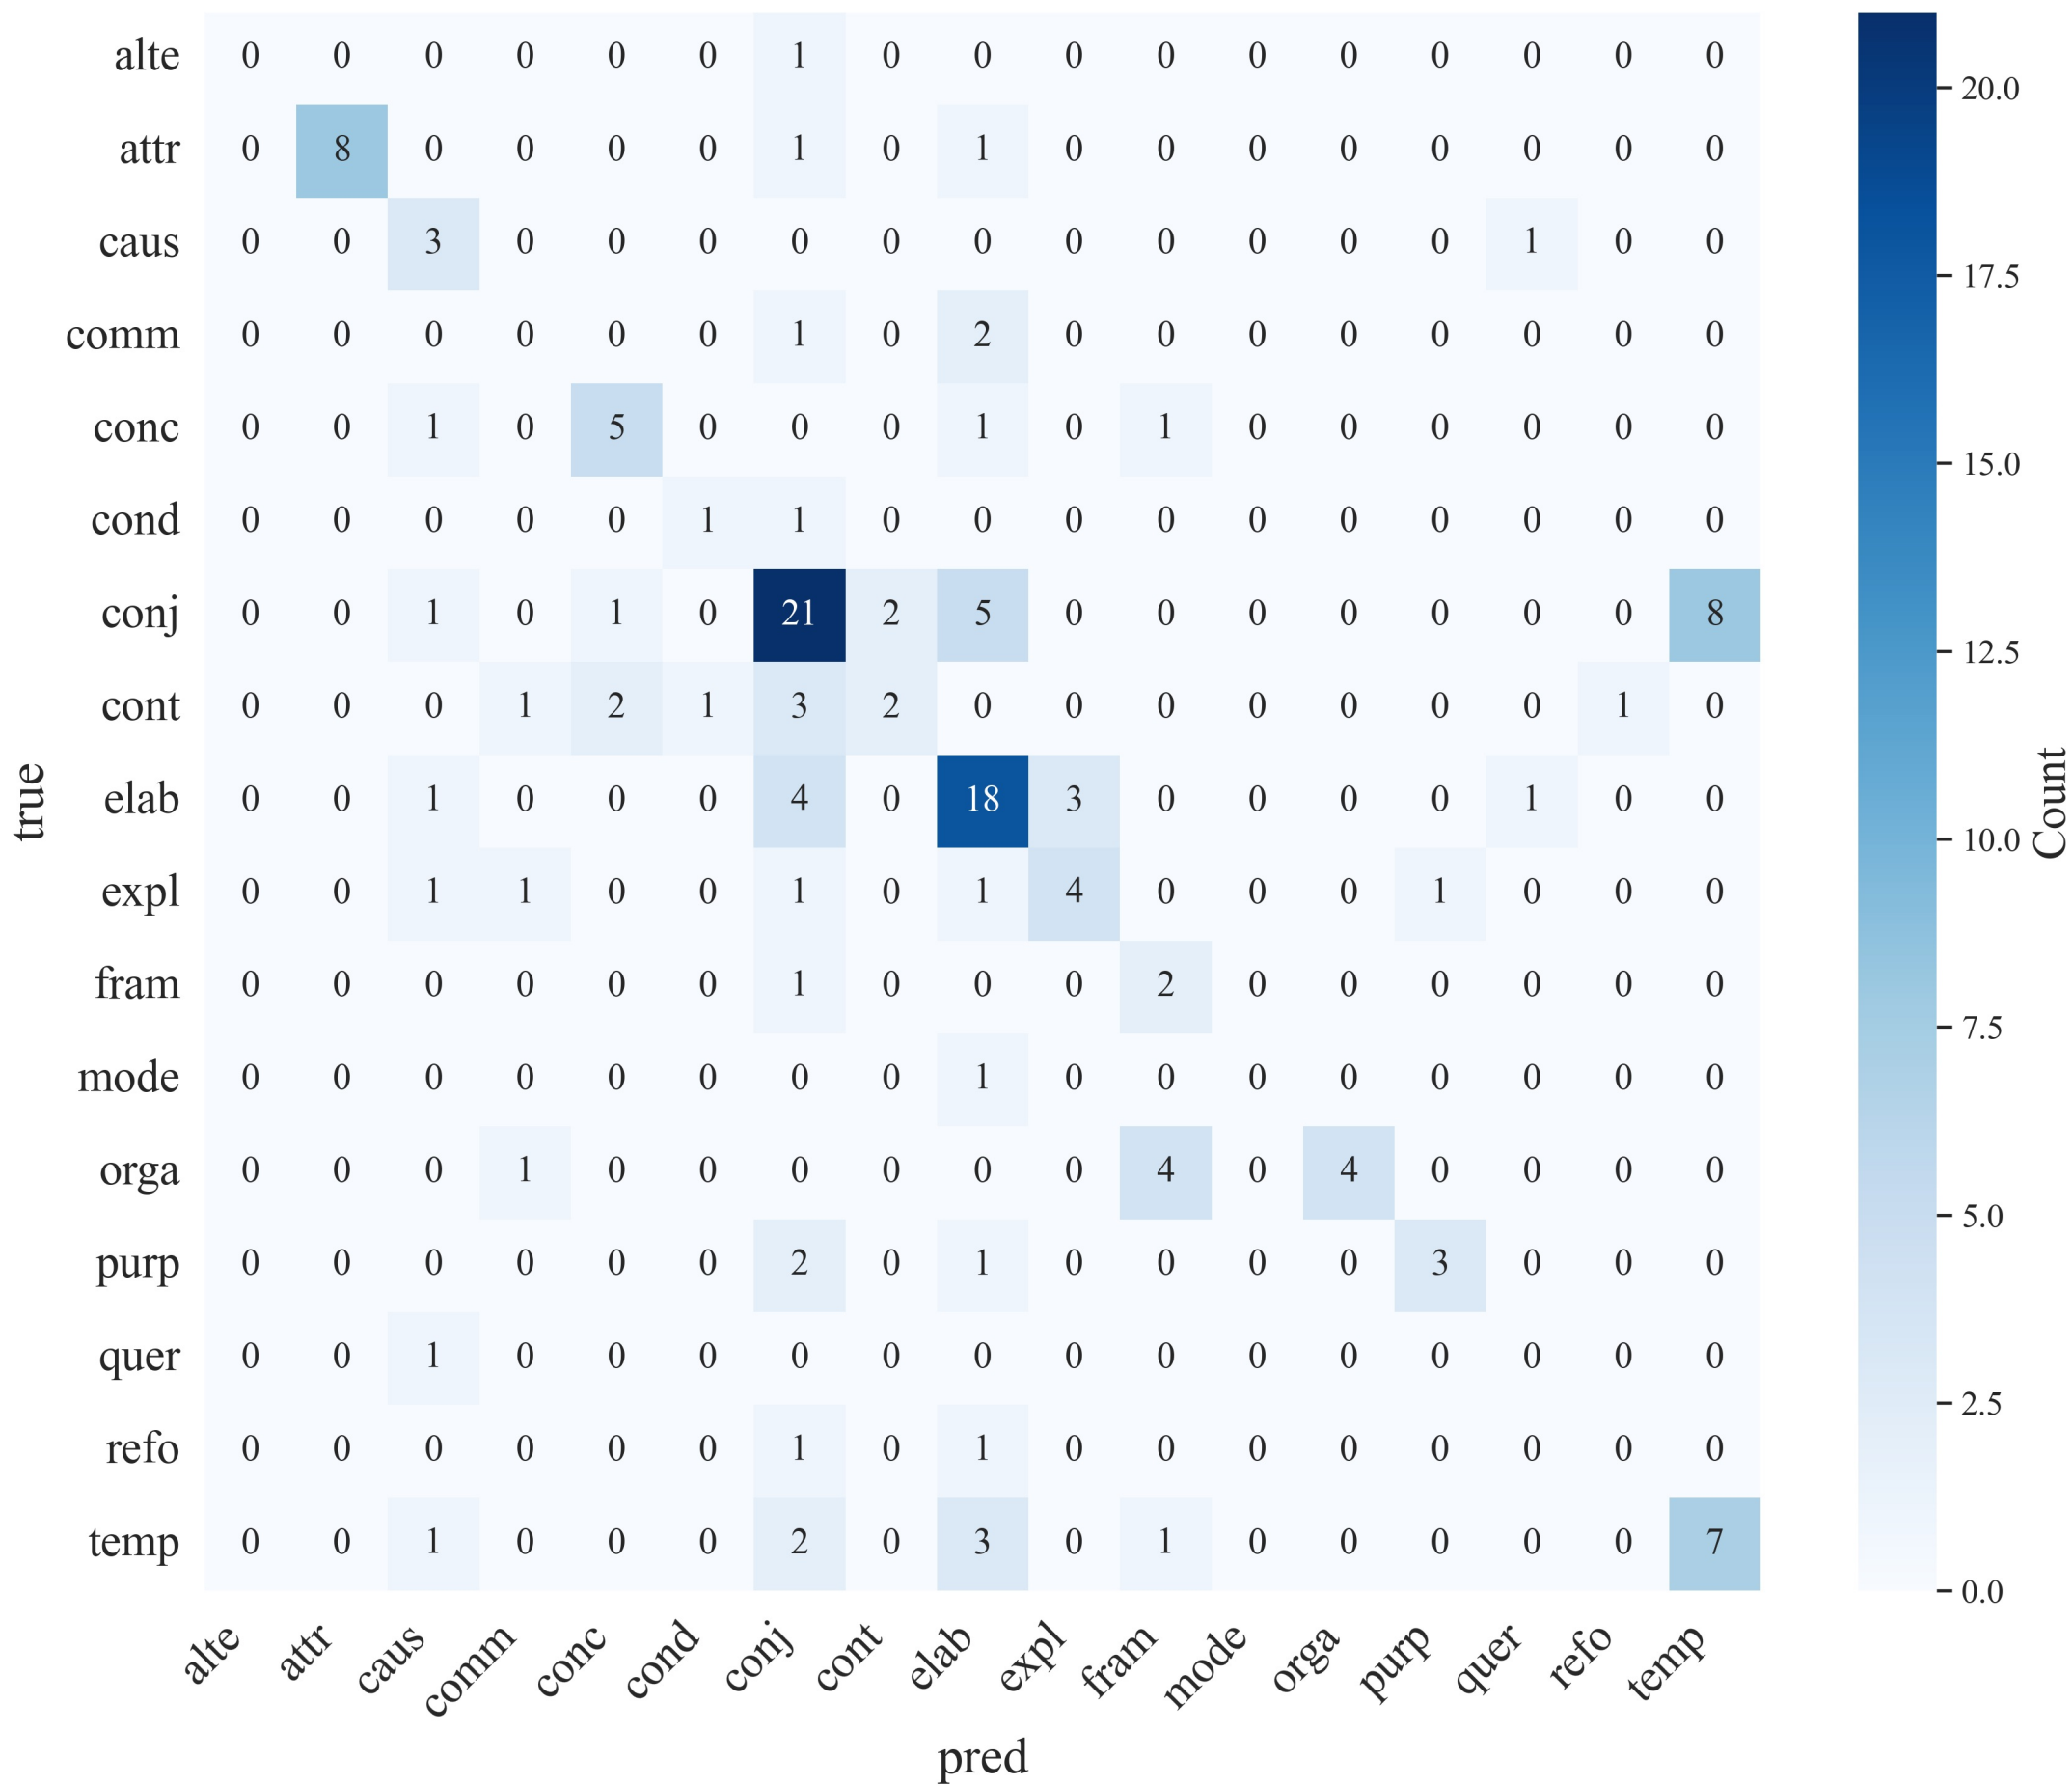

Supplement: SupplementaryMaterial [file ces_rst_crdt_confusion.pdf › imgs/ces_rst_crdt_confusion.pdf]
